# Supplementary material
Source: PubMed Central journal article supplement (PMC3543129)
Supplement: 10.3163.1536-5050.101.1.008.sg001.pdf [file 10.3163.1536-5050.101.1.008.sg001.pdf]

## Environmental health citation patterns: mapping the literature 2008–2010

Melissa L. Rethlefsen, MLS, AHIP; Alison M. Aldrich, MSI, MPH

**Table 4**  
Zone 2 titles from the cited journal articles sample (n=1,035)

| Journal title                    | Times cited | Percent cited | Cumulative percent (starting after Zone 1 titles) |
|----------------------------------|-------------|---------------|---------------------------------------------------|
| Am J Respir Crit Care Med        | 9           | 0.87          | 33.33                                             |
| Circulation                      | 9           | 0.87          | 34.20                                             |
| J Air Waste Manag Assoc          | 9           | 0.87          | 35.07                                             |
| Neurotoxicol Teratol             | 9           | 0.87          | 35.94                                             |
| Toxicol Lett                     | 9           | 0.87          | 36.81                                             |
| N Engl J Med                     | 8           | 0.77          | 37.58                                             |
| Science                          | 8           | 0.77          | 38.36                                             |
| Int J Hyg Environ Health         | 7           | 0.68          | 39.03                                             |
| J Nutr                           | 7           | 0.68          | 39.71                                             |
| Toxicology                       | 7           | 0.68          | 40.39                                             |
| Crit Rev Toxicol                 | 6           | 0.58          | 40.97                                             |
| Hum Reprod                       | 6           | 0.58          | 41.55                                             |
| J Biol Chem                      | 6           | 0.58          | 42.13                                             |
| J Toxicol Environ Health A       | 6           | 0.58          | 42.71                                             |
| J Natl Cancer Inst               | 6           | 0.58          | 43.29                                             |
| Nature                           | 6           | 0.58          | 43.86                                             |
| Reprod Toxicol                   | 6           | 0.58          | 44.44                                             |
| Am J Ind Med                     | 5           | 0.48          | 44.93                                             |
| Atmos Environ                    | 5           | 0.48          | 45.41                                             |
| BMJ                              | 5           | 0.48          | 45.89                                             |
| Cancer Res                       | 5           | 0.48          | 46.38                                             |
| Chem Res Toxicol                 | 5           | 0.48          | 46.86                                             |
| Chest                            | 5           | 0.48          | 47.34                                             |
| JAMA                             | 5           | 0.48          | 47.83                                             |
| J Epidemiol Community Health     | 5           | 0.48          | 48.31                                             |
| J Occup Environ Med              | 5           | 0.48          | 48.79                                             |
| Pediatrics                       | 5           | 0.48          | 49.28                                             |
| Aerosol Sci Technol              | 4           | 0.39          | 49.66                                             |
| Brain Res                        | 4           | 0.39          | 50.05                                             |
| Cancer Epidemiol Biomarkers Prev | 4           | 0.39          | 50.43                                             |
| Endocrinology                    | 4           | 0.39          | 50.82                                             |
| Indoor Air                       | 4           | 0.39          | 51.21                                             |
| Inhal Toxicol                    | 4           | 0.39          | 51.59                                             |
| Int Arch Occup Environ Health    | 4           | 0.39          | 51.98                                             |

| <b>Journal title</b>                          | <b>Times cited</b> | <b>Percent cited</b> | <b>Cumulative percent (starting after Zone 1 titles)</b> |
|-----------------------------------------------|--------------------|----------------------|----------------------------------------------------------|
| Int J Cancer                                  | 4                  | 0.39                 | 52.37                                                    |
| J Chromatogr B Analyt Technol Biomed Life Sci | 4                  | 0.39                 | 52.75                                                    |
| J Immunol                                     | 4                  | 0.39                 | 53.14                                                    |
| J Occup Environ Hyg                           | 4                  | 0.39                 | 53.53                                                    |
| MMWR Morb Mortal Wkly Rep                     | 4                  | 0.39                 | 53.91                                                    |
| Mol Pharmacol                                 | 4                  | 0.39                 | 54.30                                                    |
| Mol Cell Endocrinol                           | 4                  | 0.39                 | 54.69                                                    |
| Neurotoxicology                               | 4                  | 0.39                 | 55.07                                                    |
| Organohalogen Compd                           | 4                  | 0.39                 | 55.46                                                    |
| Am J Clin Nutr                                | 3                  | 0.29                 | 55.75                                                    |
| Am J Physiol Lung Cell Mol Physiol            | 3                  | 0.29                 | 56.04                                                    |
| Ann N Y Acad Sci                              | 3                  | 0.29                 | 56.33                                                    |
| Annu Rev Public Health                        | 3                  | 0.29                 | 56.62                                                    |
| Arch Toxicol                                  | 3                  | 0.29                 | 56.91                                                    |
| Atherosclerosis                               | 3                  | 0.29                 | 57.20                                                    |
| Biometrics                                    | 3                  | 0.29                 | 57.49                                                    |
| Birth Defects Res B Dev Reprod Toxicol        | 3                  | 0.29                 | 57.78                                                    |
| Carcinogenesis                                | 3                  | 0.29                 | 58.07                                                    |
| Clin Exp Allergy                              | 3                  | 0.29                 | 58.36                                                    |
| Eur Respir J                                  | 3                  | 0.29                 | 58.65                                                    |
| Food Chem Toxicol                             | 3                  | 0.29                 | 58.94                                                    |
| Int J Androl                                  | 3                  | 0.29                 | 59.23                                                    |
| Int J Epidemiol                               | 3                  | 0.29                 | 59.52                                                    |
| Int J Occup Environ Health                    | 3                  | 0.29                 | 59.81                                                    |
| J Allergy Clin Immunol                        | 3                  | 0.29                 | 60.10                                                    |
| J Environ Health                              | 3                  | 0.29                 | 60.39                                                    |
| J Med Entomol                                 | 3                  | 0.29                 | 60.68                                                    |
| J Am Coll Cardiol                             | 3                  | 0.29                 | 60.97                                                    |
| Med J Aust                                    | 3                  | 0.29                 | 61.26                                                    |
| Nucleic Acids Res                             | 3                  | 0.29                 | 61.55                                                    |
| Pharmacogenet Genomics                        | 3                  | 0.29                 | 61.84                                                    |
| Respir Res                                    | 3                  | 0.29                 | 62.13                                                    |
| Toxicol Mech Methods                          | 3                  | 0.29                 | 62.42                                                    |
